# Supplementary material for: Maternal temperature exposure impairs emotional and cognitive responses and triggers dysregulation of neurodevelopment genes in fish
Source: PeerJ journal article supplement (doi:10.7717/peerj.6338), 2019-01-31

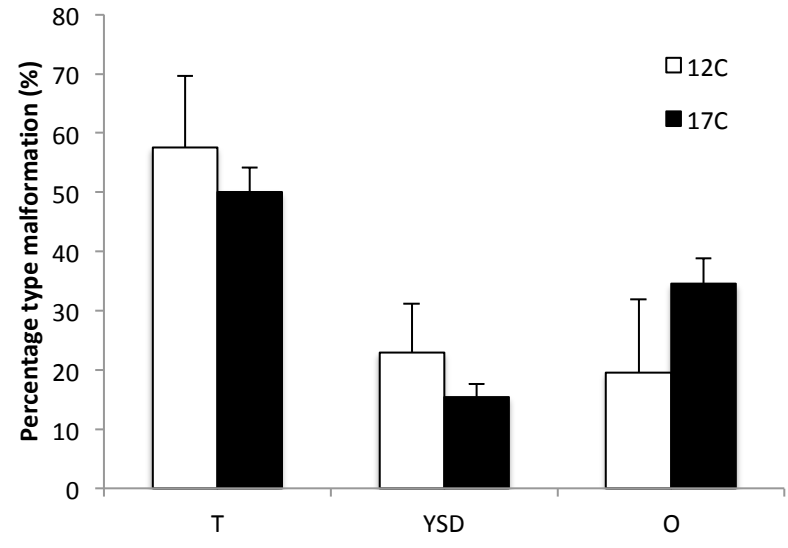

Supplement: Supplemal_data_file_1.pdf [file Supplemal_data_file_1.pdf]
